# Supplementary material for: Asymptomatic aortic stenosis: An assessment of patients’ and of their general practitioners’ knowledge, after an indexed specialized assessment in community practice
Source: PLoS One. 2017 Jun 5;12(6):e0178932. doi: 10.1371/journal.pone.0178932 (PMC5459476; doi:10.1371/journal.pone.0178932)
Supplement: S1 Table — Data set of the study. (XLSX) [file pone.0178932.s001.xlsx]

## Sheet: PATIENT Minimal Datas
Age (years)	Gender	BMI (kg/m²)	NYHA	Diabetes mellitus	Dyslipidaemia	Smoking	Hypertension	History of coronary artery disease	Atrial fibrillation	Chronic renal failure	Chronic pulmonary disease	Previous cardiac surgery	BNP (pg/mL)	Urea (g/dL)	Creatinin (mg/dL)	Haemoglobin (g/dL)	Systolic blood pressure (mmHg)	Diastolic blood pressure (mmHg)	Heart rate (Beats per minute)	LV end-diastolic diameter (mm)	LV end-systolic diameter (mm)	IVS diastolic thickness (mm)	LV posterior wall diastolic thickness (mm)	LV mass index (g/m²)	Relative Wall Thickness	LV end-diastolic volume (mL)	LV end-systolic volume (mL)	LV ejection fraction (%)	Doppler Stroke Volume Index (mL/m²)	LV outflow tract diameter (mm)	Aortic sinus diameter (mm)	Sino-tubular junction diameter (mm)	Tubular aorta diameter (mm)	E/A Ratio	Mitral deceleration time (ms)	Left atrium volume index (mL/m²)	Pulmonary Artery Systolic Pressure (mmHg)	Mean transaortic gradient (mmHg)	Aortic maximal jet velocity (m/s)	Aortic Valve Area (cm²)	AVA<1cm2	Doppler velocity ratio	6 to 12Mths FU	Patient agreed to participate ?	Patient knows Dyspnea (D)	Patient knows Dizziness/syncope (S)	Patient knows Angina (A)	Patient knows D + A	Patient knows D + S
73.5233	F	33.5938	1	1	1	0	1	0	0	0	0	0	46	0.39	8.6	11	170	70	77	43	34	15	11	105.973	0.604651	105	52	51	48.8534	23	34	28	32	0.86875	266	46.5461	43	22	3.3	1.37	0	0.33	1	1	0	0	0	0	0
73.5479	M	22.8571	1	0	1	0	1	0	1	0	1	0	149	0.32	8.9	13	178	70	45	39	23	15	14	115.071	0.74359	120	49	59	50.5343	25	37	32	37	1.17857	194		29	47	4.1	0.76	1	0.15	1	1	0	0	0	0	0
76.0959	F	31.9922	1	0	1	0	1	0	0	0	0	0	37	0.27	10.6	12	160	80	103	39	21	12	13	86.0256	0.641026	73	17	76	NA	20	24	24	28	0.623932	134	24.9772	36	46	4.3	NA	NA	NA	1	1	1	0	0	0	0
79.989	F	26.6728	2	1	0	0	1	1	0	0	0	0	NA	0.4	7.1	13.8	140	80	73	44	32	17	13	150.036	0.681818	96	32	67	37.0601	21	31	26	NA	0.576271	268	36.6234	NA	22	2.79	1.14	0	0.311	1	1	1	0	1	1	0
61.8959	M	40.5375	1	0	1	0	1	1	0	0	0	0	70	0.32	8.5	14	130	80	75	54	24	15	14	137.957	0.54	78	29	63	33	23	37	30	42	0.65	290	40	NA	21	2.91	1.45	0	0.34	1	1	0	0	0	0	0
89.6932	M	27.0416	2	0	1	0	1	1	0	0	0	0	NA	0.32	9.6	12.9	160	60	91	43	18	12	11	88.5197	0.534884	74	28	62	53.1939	24	37	29	37	0.566929	173	38.8737	34	22	2.82	1.82	0	0.4	0	1	0	0	0	0	0
77.3397	F	21.5139	1	0	0	0	1	0	0	0	0	0	NA	0.2	8	15.3	150	80	96	36	16	15	14	113.697	0.805556	72	19	73	41.4066	20	34	31	34	0.475	209	39.5605	44	54	4.41	0.77	1	0.24	0	1	0	1	0	0	0
67.1836	M	29.7004	1	0	0	0	1	0	0	1	0	0	290	0.36	13.3	9	140	80	86	60	40	18	15	230.822	0.55	227	92	60	72.5482	28	37	34	45	0.701149	206	37.2502	32	70	5.4	1.41	0	0.229	1	1	1	1	1	1	1
76.9315	F	20.9877	1	0	0	0	1	0	0	0	0	0	15	0.27	7.5	12.5	140	80	84	37	31	11	9	60.7139	0.540541	79	34	57	41.2103	22	29	23	28	0.686957	182	32.5396	34	31	3.55	0.94	1	0.238	1	1	1	0	0	0	0
58.8575	F	26.3656	1	0	0	0	0	1	0	0	0	0	20	0.34	8.3	12	120	80	77	47	27	12	10	96.8435	0.468085	141	65	54	45.2671	22	35	36	50	1.16216	212	38.3329	30	30	3.4	1.03	0	0.27	1	1	1	1	0	0	1
82.8301	F	25.1486	1	0	0	0	1	0	0	1	0	0	215	0.7	17.4	11	150	70	58	49	27	12	13	138.842	0.510204	134	48	64	74.9576	22	31	28	34	1.37681	253	49.9023	34	72	5.53	0.83	1	0.22	0	1	0	0	0	0	0
81.2904	F	21.1073	1	1	1	0	1	0	0	0	0	0	103	0.4	10.3	12	150	60	80	43	22	8	8	61.7122	0.372093	68	16	76	43.4122	19	30	26	27	0.87	203	42.4223	NA	59	4.96	0.62	1	0.22	1	1	1	1	1	1	1
61.011	M	21.2585	1	0	0	0	0	0	0	0	0	0	109	0.4	10	15.3	124	82	80	51	28	11	10	119.637	0.411765	154	63	59	43.4459	21	31	26	33	1.34921	225	20.3189	23	46	4.34	0.76	1	0.22	0	1	0	1	1	0	0
75.5096	F	33.3333	1	0	0	0	1	0	0	0	1	0	97	0.21	8.1	14	140	80	70	41	25	10	10	74.3987	0.487805	105	35	67	48.958	21	31	26	32	1.30952	192	40.1637	41	24	3.13	1.12	0	0.33	1	1	1	0	1	1	0
62.1562	M	24.281	1	1	1	0	1	1	0	0	0	0	15	0.19	7.9	13.5	140	80	88	47	27	9	11	89.2313	0.425532	122	48	61	48.0891	25	40	37	42	0.361111	194	43.5626	22	36	3.85	1.1	0	0.22	0	1	1	0	0	0	0
57.7863	M	28.6851	1	0	0	0	1	0	0	0	0	0	NA	NA	NA	NA	150	90	78	50	27	11	13	121.033	0.48	174	69	61	35.6554	25	32	27	32	0.702703	261	13.4965	NA	20	2.95	1.16	0	0.237	0	1	0	0	0	0	0
81.1096	F	26.4463	2	0	1	0	1	0	0	0	0	0	11	0.21	8.6	13.4	130	80	95	36	22	13	13	87.7934	0.722222	85	31	64	41.83	22	30	26	30	0.577778	496	26.4231	23	26	3.32	1.24	0	0.327	0	1	1	1	1	1	1
77.4082	M	25.1474	1	1	0	0	0	0	0	0	0	0	87	0.39	10.2	12.6	125	69	61	27	40	19	13	72.8785	1.18519	144	34	67	46.5933	22	35	29	34	0.757143	290	40	21	43	4.28	0.96	1	0.25	1	1	0	0	0	0	0
64.0959	F	26.4463	1	1	1	0	1	0	0	0	0	0	19	0.26	6.6	11.4	130	70	67	40	26	15	14	121.153	0.725	62	22	64	45.7365	21	30	27	28	1.02597	214	33.0289	25	23	3.04	1.1	0	0.31	1	1	1	1	1	1	1
54.6219	F	26.3146	1	1	1	0	1	0	0	0	0	0	7	0.43	11	12.4	145	80	91	38	21	9	13	84.5134	0.578947	96	38	61	37.5131	19	31	27	NA	1	177	18.2804	22	17	2.75	1.15	0	0.4	1	1	0	0	0	0	0
74.4548	F	19.721	1	0	0	1	1	0	0	0	0	0	51	0.23	7	14.6	150	80	113	40	24	12	10	90.8119	0.55	98	37	62	57.1952	23	30	30	33	0.875	223	28.7985	28	49	4.2	0.8	1	0.2	1	1	1	1	1	1	1
59.6904	M	35.4922	1	0	0	0	1	0	0	0	0	0	23	0.53	11.7	15	120	80	67	48	13	12	12	97.5731	0.5	96	33	65	37.319	22	36	35	37	0.917808	171	21.4306	49	43	4.2	1.13	0	0.25	1	1	1	0	1	1	0
80.6219	F	23.7812	1	1	1	0	1	1	0	0	0	0	142	0.21	6.7	11.1	140	70	66	41	27	12	11	113.292	0.560976	61	20	72	42.0403	20	29	28	32	0.42	272	26.7772	34	25	3.13	0.87	1	0.25	0	1	1	0	0	0	0
73.0493	M	28.9979	1	0	1	0	1	0	0	0	0	0	54	0.27	8.5	10.8	140	60	80	49	25	15	15	142.914	0.612245	218	92	58	33.0308	22	31	29	29	0.942857	192	63.1436	39	37	3.9	1.03	0	0.24	0	1	1	0	1	1	0
64.8493	M	27.0993	2	0	1	0	1	1	0	0	1	0	15	0.21	10.4	12	120	60	75	39	25	11	11	77.2665	0.564103	92	18	80	46.0162	21	33	31	34	0.65	245	37	27	23	3.02	1.26	0	0.36	1	1	0	0	0	0	0
70.6795	F	30.3302	2	1	1	1	1	0	0	0	0	0	NA	0.29	5.2	9.2	150	70	77	35	17	15	16	117.172	0.885714	82	28	65	50.6132	20	31	26	26	0.690722	220	40.8728	30	21	2.98	1.35	0	0.43	0	1	1	0	0	0	0
33.989	F	32.2708	1	0	0	0	0	0	0	0	0	0	54	NA	NA	NA	139	92	93	37	15	12	16	91.2054	0.756757	105	39	62	28.8024	21	31	30	30	1.05263	152	34.748	29	42	3.83	0.66	1	0.191	1	1	1	1	1	1	1
79.0767	M	25.6055	1	0	1	0	1	0	0	0	0	0	189	0.36	12.5	13.1	130	60	58	38	30	12	12	81.6592	0.631579	126	52	59	48.7795	22	37	32	35	0.641975	342	36.3764	25	28	3.53	1.03	0	0.27	1	1	0	0	0	0	0
77.2986	M	29.3878	1	0	1	0	0	1	0	0	0	0	27	0.41	9.5	13.2	140	80	80	50	19	14	13	131.881	0.54	151	77	50	45.3965	24	35	30	33	0.540323	163	29.1636	36	31	3.57	1.38	0	0.3	1	1	0	0	0	0	0
72.9288	M	30.1103	1	1	1	1	1	1	0	0	0	1	221	0.26	11.9	13.2	120	60	55	43	36	14	14	121.713	0.651163	165	80	51	41.9225	22	32	27	38	1.54762	234	45.7122	43	39	3.9	0.8	1	0.21	0	1	0	0	0	0	0
81.6192	M	28.9647	1	0	1	0	1	0	0	0	0	0	55	0.44	12.9	11	140	80	53	54	35	14	14	147.595	0.518519	115	46	60	34.2204	22	39	33	37	0.746032	308	31.9741	NA	41	4.1	0.73	1	0.192	0	1	1	1	0	0	1
63.9342	F	23.9361	1	0	1	0	1	0	0	0	0	0	173	0.2	7.5	NA	190	80	61	38	22	7	10	57.8428	0.447368	73	25	66	45.3214	21	37	28	42	0.690909	320	41	27	46	4.19	0.62	1	0.18	1	1	1	0	0	0	0
79.0877	M	24.2215	1	0	0	0	0	1	0	0	0	0	33	0.27	6.6	12.5	130	80	61	51	28	11	9	103.09	0.392157	113	44	61	45.875	25	40	32	36	0.627907	286	24.7509	27	30	3.32	1	0	0.207	0	1	0	0	0	0	0
72.8575	M	24.1588	1	0	1	0	1	1	0	0	1	0	55	0.53	16	13.4	140	80	79	41	19	13	14	113.503	0.658537	146	17	88	45.3614	20	39	33	39	0.452632	311	61.119	27	48	4.47	0.93	1	0.295	1	1	0	0	0	0	0
85.1479	M	25.8264	1	0	1	0	1	1	0	0	1	0	NA	0.4	12	12.9	170	70	67	43	27	12	13	98.84	0.581395	141	67	52	43.7621	21	28	20	NA	1.11111	198	45.5085	NA	40	4	0.8	1	0.24	0	1	0	1	1	0	0
62.2548	M	23.8895	1	0	0	0	0	0	0	0	0	0	39	0.29	8.3	15.6	120	70	74	45	32	11	10	85.9045	0.466667	122	50	59	47.9408	22	47	38	49	0.675439	340	27.8647	30	34	3.83	1.16	0	0.31	1	1	1	1	1	1	1
77.8301	M	35.4308	1	1	1	0	1	1	0	0	0	1	154	0.7	10.4	10.3	140	80	69	55	44	15	11	140.608	0.472727	222	80	63	46.1353	23	35	28	33	0.416667	263	55.5492	NA	39	4.2	0.98	1	0.22	1	1	0	0	0	0	0
64.937	F	33.1213	2	1	0	0	1	0	0	0	0	0	NA	0.37	9.7	12.9	170	80	120	44	33	13	13	107.467	0.590909	106	35	67	35.3664	23	33	27	29	0.671756	171	45.0878	NA	40	4.15	1.01	0	0.24	0	1	1	0	0	0	0
63.3507	M	27.31	1	1	1	1	1	0	0	0	0	0	NA	0.4	8.1	15.1	140	90	84	45	20	14	15	136.576	0.644444	127	37	71	52.0831	23	33	28	37	1.13333	286	31	NA	18	2.8	1.57	0	0.45	1	1	0	0	0	0	0
56.5781	F	35.5248	1	0	0	0	1	0	0	0	0	0	34	0.31	6.2	13.4	130	80	71	46	23	14	11	117.626	0.543478	95	31	62	39.1812	20	31	26	31	0.701299	179	32.5515	NA	44	4.1	0.77	1	0.25	1	1	1	1	1	1	1
63.6959	M	26.3656	1	1	1	0	1	0	0	0	0	0	40	0.41	7.4	12.4	140	80	75	41	29	15	13	111.886	0.682927	106	42	60	43.0387	21	29	26	30	0.625	391	38.8509	NA	46	4.48	0.98	1	0.28	1	1	1	0	0	0	0
78.8055	F	23.2446	1	1	1	0	0	0	0	0	1	0	57	0.36	7.3	11	110	60	80	33	18	11	9	63.0317	0.606061	78	28	64	39.4714	21	29	27	29	0.666667	263	40.2417	NA	15	2.5	1.13	0	0.33	0	1	1	0	1	1	0
79.5123	F	24.3865	1	0	1	0	1	0	0	0	0	0	268	0.26	4.7	9.6	168	73	63	36	25	14	12	93.9773	0.722222	88	37	58	42.556	20	27	26	32	0.645455	282	41.2479	26	18	2.7	1.02	0	0.32	1	1	1	0	1	1	0
78.1452	F	24.3375	1	0	0	0	1	0	0	0	1	0	NA	0.49	8.3	13.4	130	80	60	43	25	14	14	124.895	0.651163	83	22	73	63.385	24	34	30	35	0.8625	251	36	20	39	4.2	1.12	0	0.37	1	1	1	0	0	0	0
79.1781	M	23.1084	1	0	1	0	0	0	0	0	0	0	NA	NA	NA	NA	110	70	60	41	32	11	11	85.6208	0.536585	101	37	71	64.1082	25	40	32	41	0.680412	204	26	26	23	3.1	1.57	0	0.31	0	1	0	0	0	0	0
75.8685	F	27.7662	1	0	1	0	1	1	0	0	0	0	130	0.51	12.7	11.7	120	60	77	44	29	10	14	121.864	0.545455	58	29	57	38.0201	19	28	25	29	0.945946	201	30.0272	41	32	3.6	0.8	1	0.22	1	1	1	0	0	0	0
51.7945	F	28.6048	2	0	0	1	0	0	0	0	0	0	90	0.36	8	13.8	140	80	76	49	30	12	11	114.647	0.469388	158	56	57	60.074	26	34	33	39	1.31579	156	39	NA	34	3.74	1.09	0	0.21	0	1	0	0	0	0	0
69.1753	F	27.0552	1	0	0	0	1	0	0	0	0	0	91	0.45	6	13	110	60	67	51	31	11	11	127.509	0.431373	118	48	59	52.2362	22	31	29	32	0.875	346	47.821	25	42	4.2	0.86	1	0.23	0	1	1	0	0	0	0
77.1178	M	24.6181	2	0	1	0	1	1	1	0	0	0	170	0.42	12.9	13	140	80	70	53	39	11	13	130.348	0.45283	154	51	60	46.0486	24	32	32	33	0.675676	253	36.1537	26	31	3.6	1.01	0	0.22	1	1	0	0	0	0	0
80.2	F	38.2653	1	0	1	0	1	0	0	0	0	0	78	0.39			150	80	76	50	28	8	8	60.2274	0.32	114	51	55	37.2325	22	34	32	36	0.625	295	45.4344	30	24	2.9	1.08	0	0.29	0	1	0	0	0	0	0
29.5014	F	22.0492	1	0	0	0	0	0	0	0	1	0	87	0.18	5	13.6	105	60	94	47	34	9	9	102.94	0.382979	93	32	66	43.2125	20	32	32	31	3.02703	119	36.2156	53	42	4	0.7	1	0.23	1	1	1	0	0	0	0
63.2438	M	32.1466	1	1	0	0	1	1	0	0	0	1	NA	0.29	7.9	12.9	121	77	65	42	27	13	14	100.183	0.642857	114	48	58	41.2699	23	36	34	38	1.13043	271	28.3949	33	17	2.7	1.43	0	0.34	0	1	0	0	0	0	0
77.0055	F	30.0781	1	0	0	0	1	0	0	0	0	0	43	0.44	8.2	NA	150	80	54	51	27	10	10	101.318	0.392157	97	30	69	49.3849	23	36	30	41	1.06944	192	22.69	28	22	3.1	1.21	0	0.29	0	1	1	0	0	0	0
59.5644	F	35.3386	1	0	1	0	1	0	0	0	0	0	41	0.37	8.1	13.9	160	100	89	48	24	10	10	87.8592	0.416667	86	29	65	29.1049	21	27	22	29	0.763636	166	76	37	44	4.66	0.83	1	0.19	0	1	0	0	0	0	0
82.0521	M	26.9598	1	0	1	0	1	0	0	0	0	0	67	0.3	9.4	13.5	120	60	65	43	28	13	12	102.812	0.58	162	58	64	35	21	38	36	36	0.54	222	78.8958	35	55	4.57	0.59	1	0.17	1	1	1	1	1	1	1
65.137	F	38.8739	1	1	1	0	1	0	0	0	0	0	112	0.29	7.4	13.1	150	80	86	49	28	15	12	135.949	0.55102	127	46	64	40.4875	21	26	20	28	0.724409	151	43.2219	30	71	5.2	0.67	1	0.18	1	1	1	0	1	1	0
75.3123	M	26.1224	1	1	1	1	1	0	0	0	0	0	78	0.6	8.9	12.7	120	60	53	50	32	9	10	85.8675	0.38	124	44	65	28.8997	22	36	35	37	0.84375	251	50.7093	25	38	3.9	0.58	1	0.15	1	1	1	0	1	1	0
68.3452	M	23.9869	1	0	0	0	1	0	0	0	1	0	24	0.26	10.9	16.3	160	80	50	47	27	14	13	129.368	0.574468	128	51	60	57.1469	21	37	33	39	0.777778	209	43.8484	31	32	3.9	1.29	0	0.37	1	1	1	1	1	1	1
57.3096	M	27.4145	1	0	1	0	1	0	1	0	1	0	42	0.4	9.5	15.4	130	80	60	48	24	13	13	122.395	0.541667	128	38	70	40.7606	20	37	34	40	0.875	201	29.9563	NA	52	4.6	0.7	1	0.24	1	1	1	0	1	1	0
76.5918	M	22.8571	1	0	1	0	1	1	0	0	0	0	174	0.34	11	12.8	133	54	57	48	36	10	10	91.9456	0.416667	131	42	68	47.3725	22	39	30	32	0.738095	230	43.9105	36	37	3.9	0.87	1	0.23	1	1	0	0	0	0	0
78.4548	F	25.7117	2	0	1	0	1	0	1	0	0	0	135	0.46	9.4	14.3	150	80	95	60	35	11	13	174.986	0.4	84	23	72	33.4654	20	30	25	34	NA	121	84.3019	45	21	3.1	0.94	1	0.26	1	1	1	0	0	0	0
81.9836	M	24.7721	2	1	1	0	1	1	1	0	0	0	148	0.4	15.6	12.1	135	60	64	52	30	11	12	122.917	0.442308	135	48	64	35.7219	19	33	25	33	0.963303	170	49.3712	39	40	4.33	0.84	1	0.23	1	1	0	1	0	0	0
72.5151	F	23.8281	1	0	0	0	1	0	0	0	0	1	NA	NA	NA	NA	150	60	52	42	24	14	15	147.596	0.69	156	57	63	47	20	38	32	34	0.61	318	51	29	57	4.7	0.56	1	0.19	1	1	1	0	0	0	0
66.7534	M	26.6436	1	0	1	0	1	0	1	0	0	1	44	0.26	8.3	15.4	140	80	72	45	30	13	13	116.411	0.577778	87	32	63	45.6225	24	34	32	45	0.772727	230	27.7944	33	28	3.43	1.02	0	0.23	1	1	0	1	1	0	0
[truncated: 8 more columns]

## Sheet: GP Minimal Datas
GP agrees to participate ?	GP knows Dyspnea (D)	GP knows Dizziness/syncope (S)	GP knows Angina (A)	GP knows D + A	GP knows D + S	GP knows A + S	GP knows A + S + D	GP refers to cardiologist	GP refers to cardiac surgeon	GP refers to the Heart Valve Disease specialized cardiologist
1	1	0	1	1	0	0	0	1	0	0
1	1	0	1	1	0	0	0	1	0	0
1	0	1	0	0	0	0	0	1	0	0
1	1	0	1	1	0	0	0	1	0	0
1	1	0	0	0	0	0	0	1	0	0
1	1	0	1	1	0	0	0	1	0	0
1	1	0	1	1	0	0	0	1	0	0
1	1	1	0	0	1	0	0	1	0	0
1	1	1	0	0	0	1	0	1	0	0
1	1	1	1	1	1	1	1	1	0	0
1	1	1	1	1	1	1	1	1	0	0
1	1	1	0	0	1	0	0	1	0	0
1	1	0	0	0	0	0	0	1	0	0
1	1	0	0	0	0	0	0	1	0	0
1	1	0	0	0	0	0	0	1	0	0
1	0	0	0	0	0	0	0	1	0	0
1	1	0	1	1	0	0	0	1	0	0
1	0	0	0	0	0	0	0	1	0	0
1	1	0	0	0	0	0	0	1	0	0
1	1	0	0	0	0	0	0	1	0	0
1	1	0	0	0	0	0	0	1	0	0
1	1	1	1	1	1	1	1	1	0	0
1	1	0	1	1	0	0	0	1	0	0
1	1	0	0	0	0	0	0	1	0	0
1	1	0	1	1	0	0	0	1	0	0
1	1	0	1	1	0	0	0	1	0	0
1	1	0	0	0	0	0	0	1	0	0
1	1	1	0	0	1	0	0	1	0	0
1	1	0	1	1	0	0	0	1	0	0
1	1	0	0	0	0	0	0	1	0	0
1	1	0	0	0	0	0	0	1	0	0
1	1	0	0	0	0	0	0	1	0	0
1	1	0	1	1	0	0	0	1	0	0
1	0	0	0	0	0	0	0	1	0	0
1	1	0	1	1	0	0	0	1	0	0
1	1	0	0	0	0	0	0	1	0	0
1	1	1	1	1	1	1	1	1	0	0
1	1	0	1	1	0	0	0	1	0	0
1	1	0	0	0	0	0	0	1	0	0
1	1	0	0	0	0	0	0	1	0	0
1	1	0	0	0	0	0	0	1	0	0
1	1	1	1	1	1	1	1	1	0	0
1	1	0	0	0	0	0	0	1	0	0
1	1	0	1	1	0	0	0	1	0	0
1	0	0	1	0	0	0	0	1	0	0
1	1	0	0	0	0	0	0	1	0	0
1	1	1	1	1	1	1	1	1	0	0
1	1	0	0	0	0	0	0	1	0	0
1	1	1	0	0	1	0	0	0	0	1
1	1	0	0	0	0	0	0	1	0	0
1	0	1	1	0	0	1	0	1	0	0
1	1	0	0	0	0	0	0	1	0	0
1	1	0	0	0	0	0	0	1	0	0
1	1	1	1	1	1	1	1	0	0	1
1	1	0	1	1	0	0	0	1	0	0
1	1	0	1	1	0	0	0	1	0	0
1	1	1	1	1	1	1	1	1	0	0
1	1	0	0	0	0	0	0	1	0	0
